# Supplementary material for: Albumin Redox Modifications Promote Cell Calcification Reflecting the Impact of Oxidative Status on Aortic Valve Disease and Atherosclerosis
Source: MDPI journal article supplement (doi:10.3390/antiox13010108), 2024-01-16

*Supplementary Material*

# **Albumin Redox Modifications Promote Cell Calcification Reflecting the impact of Oxidative Status on Aortic Valve Disease and Atherosclerosis**

**Tamara Sastre-Oliva<sup>1, 2†</sup>, Nerea Corbacho-Alonso<sup>1, 2†</sup>, Elena Rodriguez-Sanchez<sup>3</sup>, Elisa Mercado-García<sup>3</sup>, Ines Perales-Sanchez<sup>1, 2</sup>, German Hernandez-Fernandez<sup>1, 2</sup>, Cristina Juarez-Alia<sup>1, 2</sup>, Teresa Tejerina<sup>4</sup>, Luis F. López-Almodóvar<sup>5</sup>, Luis R. Padial<sup>6</sup>, Pedro L Sánchez<sup>7, 8</sup>, Ernesto Martín-Núñez<sup>9</sup>, Natalia López-Andrés<sup>9</sup>, Gema Ruiz-Hurtado<sup>3, 10</sup>, Laura Mourino-Alvarez<sup>1, 2†</sup>, Maria G Barderas<sup>1, 2†</sup>**

† These authors contributed equally to this work.

‡ These authors contributed equally to this work.

Correspondence: M.G. Barderas, megonzalezb@sescam.jccm.es;  
marugbarderas@gmail.com; Phone: +34 925247826 FAX: +34 925247745.

## Tables

Table S1. Antioxidant defense markers of oxidative damage (the mean  $\pm$  SD is shown).

|                                           | C                  | C+CAD              | CAVD               | CAVD+CAD           |
|-------------------------------------------|--------------------|--------------------|--------------------|--------------------|
| <b>Carbonyls (nmol/mg protein)</b>        | 0.64 $\pm$ 0.11    | 0.61 $\pm$ 0.12    | 0.55 $\pm$ 0.13    | 0.61 $\pm$ 0.16    |
| <b>oxLDL (U/L)</b>                        | 144.78 $\pm$ 32.31 | 123.7 $\pm$ 29.08  | 148.18 $\pm$ 35.81 | 146.48 $\pm$ 34.53 |
| <b>80HdG (ng/mL)</b>                      | 41.84 $\pm$ 7.07   | 34.56 $\pm$ 12.41  | 55.82 $\pm$ 12.24  | 63.34 $\pm$ 16.09  |
| <b>XOD (<math>\mu</math>U/mg protein)</b> | 0.52 $\pm$ 0.22    | 0.79 $\pm$ 0.4     | 0.71 $\pm$ 0.35    | 0.82 $\pm$ 0.42    |
| <b>TAC (AUC)</b>                          | 821.27 $\pm$ 40.52 | 810.53 $\pm$ 49.38 | 833.27 $\pm$ 52.59 | 815.77 $\pm$ 23.63 |
| <b>CAT (mU/mg protein)</b>                | 10.35 $\pm$ 5.12   | 11.14 $\pm$ 4.33   | 10.9 $\pm$ 4.08    | 13.03 $\pm$ 4.01   |
| <b>SOD (mU/mg protein)</b>                | 8.79 $\pm$ 1.29    | 9.08 $\pm$ 1.39    | 10.44 $\pm$ 2.46   | 9.57 $\pm$ 2.71    |
| <b>Thiols (<math>\mu</math>M)</b>         | 20.94 $\pm$ 4.08   | 18.93 $\pm$ 3.05   | 14.98 $\pm$ 3.31   | 15.63 $\pm$ 3.50   |
| <b>OxyScore (a.u.)</b>                    | -0.87 $\pm$ 1.85   | -2.15 $\pm$ 2.09   | 0.87 $\pm$ 2.46    | 2.54 $\pm$ 2.41    |
| <b>AntioxyScore (a.u.)</b>                | 0.42 $\pm$ 1.59    | 0.56 $\pm$ 2.15    | 2.06 $\pm$ 1.97    | 1.43 $\pm$ 2.27    |

**Table S2.** Comparison of antioxidant defense markers and markers of oxidative damage of between the different groups studied (age and dyslipidemia-adjusted p-values are shown).

[illegible]

**Table S3.** Calcification of VICs (the mean intensity of Alizarin Red staining is shown): FIBm, medium for fibroblast medium; HSA, human serum albumin; OSTm, osteogenic medium; OxHSA, oxidized human serum albumin; RedHSA, reduced human serum albumin.

| [HSA]     |              | FIBm           | OSTm           |
|-----------|--------------|----------------|----------------|
| 0 mg/ml   | Basal medium | 1069.36±7.83   | 1180.61±58.63  |
|           | RedHSA       | 1400.52±68.45  | 1981.23±104.15 |
| 0.5 mg/ml | HSA          | 1699.98±157.90 | 1438.09±29.40  |
|           | OxHSA        | 1804.57±60.09  | 1642.35±174.97 |
| 1 mg/ml   | RedHSA       | 1811.12±138.81 | 3324.85±151.09 |
|           | HSA          | 2052.98±402.16 | 2160.24±104.73 |
|           | OxHSA        | 2591.99±319.68 | 2272.07±85.93  |
| 2 mg/ml   | RedHSA       | 1839.98±68.89  | 3510.40±106.34 |
|           | HSA          | 2044.81±349.25 | 2560.01±130.42 |
|           | OxHSA        | 2844.12±162.84 | 3145.17±307.82 |

**Table S4.** Comparison of the treatments of VICs in vitro (p-values are shown): FIBm, medium for fibroblast medium; HSA, human serum albumin; OSTm, osteogenic medium; OxHSA, oxidized human serum albumin; RedHSA, reduced human serum albumin. The P-values<0.05 are shown in bold and italics.

|      |              | FIB          |              |              |              |              |              |              |              |              |              | OST          |              |              |              |              |              |              |              |              |              |
|------|--------------|--------------|--------------|--------------|--------------|--------------|--------------|--------------|--------------|--------------|--------------|--------------|--------------|--------------|--------------|--------------|--------------|--------------|--------------|--------------|--------------|
|      |              | FIBm         | HSA (0.5)    | HSA (1)      | HSA (2)      | OxyHSA (0.5) | OxyHSA (1)   | OxyHSA (2)   | RedHSA (0.5) | RedHSA (1)   | RedHSA (2)   | OSTm         | HSA (0.5)    | HSA (1)      | HSA (2)      | OxyHSA (0.5) | OxyHSA (1)   | OxyHSA (2)   | RedHSA (0.5) | RedHSA (1)   | RedHSA (2)   |
| FIBm | FIBm         |              | <b>0.028</b> | <b>0.000</b> | <b>0.000</b> | <b>0.003</b> | <b>0.000</b> | <b>0.000</b> | 1.000        | <b>0.003</b> | <b>0.002</b> | 1.000        | 1.000        | <b>0.000</b> | <b>0.000</b> | 0.090        | <b>0.000</b> | <b>0.000</b> | <b>0.000</b> | <b>0.000</b> | <b>0.000</b> |
|      | HSA (0.5)    | <b>0.028</b> |              | 1.000        | 1.000        | 1.000        | <b>0.000</b> | <b>0.000</b> | 1.000        | 1.000        | 1.000        | 0.253        | 1.000        | 0.754        | <b>0.000</b> | 1.000        | 0.092        | <b>0.000</b> | 1.000        | <b>0.000</b> | <b>0.000</b> |
|      | HSA (1)      | <b>0.000</b> | 1.000        |              | 1.000        | 1.000        | 0.174        | <b>0.001</b> | <b>0.018</b> | 1.000        | 1.000        | <b>0.000</b> | <b>0.039</b> | 1.000        | 0.320        | 1.000        | 1.000        | <b>0.000</b> | 1.000        | <b>0.000</b> | <b>0.000</b> |
|      | HSA (2)      | <b>0.000</b> | 1.000        | 1.000        |              | 1.000        | 0.149        | <b>0.001</b> | <b>0.022</b> | 1.000        | 1.000        | <b>0.000</b> | <b>0.046</b> | 1.000        | 0.274        | 1.000        | 1.000        | <b>0.000</b> | 1.000        | <b>0.000</b> | <b>0.000</b> |
|      | OxyHSA (0.5) | <b>0.003</b> | 1.000        | 1.000        | 1.000        |              | <b>0.001</b> | <b>0.000</b> | 1.000        | 1.000        | 1.000        | <b>0.033</b> | 1.000        | 1.000        | <b>0.002</b> | 1.000        | 0.662        | <b>0.000</b> | 1.000        | <b>0.000</b> | <b>0.000</b> |
|      | OxyHSA (1)   | <b>0.000</b> | <b>0.000</b> | 0.174        | 0.149        | <b>0.001</b> |              | 1.000        | <b>0.000</b> | <b>0.001</b> | <b>0.002</b> | <b>0.000</b> | <b>0.000</b> | 1.000        | 1.000        | <b>0.000</b> | 1.000        | 0.133        | <b>0.042</b> | <b>0.003</b> | <b>0.000</b> |
|      | OxyHSA (2)   | <b>0.000</b> | <b>0.000</b> | <b>0.001</b> | <b>0.001</b> | <b>0.000</b> | 1.000        |              | <b>0.000</b> | <b>0.000</b> | <b>0.000</b> | <b>0.000</b> | <b>0.000</b> | <b>0.010</b> | 1.000        | <b>0.000</b> | 0.092        | 1.000        | <b>0.000</b> | 0.520        | <b>0.014</b> |
|      | RedHSA (0.5) | 1.000        | 1.000        | <b>0.018</b> | <b>0.022</b> | 1.000        | <b>0.000</b> | <b>0.000</b> |              | 1.000        | 1.000        | 1.000        | 1.000        | <b>0.002</b> | <b>0.000</b> | 1.000        | <b>0.000</b> | <b>0.000</b> | 0.077        | <b>0.000</b> | <b>0.000</b> |
|      | RedHSA (1)   | <b>0.003</b> | 1.000        | 1.000        | 1.000        | 1.000        | <b>0.001</b> | <b>0.000</b> | 1.000        |              | 1.000        | <b>0.029</b> | 1.000        | 1.000        | <b>0.002</b> | 1.000        | 0.744        | <b>0.000</b> | 1.000        | <b>0.000</b> | <b>0.000</b> |
|      | RedHSA (2)   | <b>0.002</b> | 1.000        | 1.000        | 1.000        | 1.000        | <b>0.002</b> | <b>0.000</b> | 1.000        | 1.000        |              | <b>0.016</b> | 1.000        | 1.000        | <b>0.004</b> | 1.000        | 1.000        | <b>0.000</b> | 1.000        | <b>0.000</b> | <b>0.000</b> |
| OSTm | OSTm         | 1.000        | 0.253        | <b>0.000</b> | <b>0.000</b> | <b>0.033</b> | <b>0.000</b> | <b>0.000</b> | 1.000        | <b>0.029</b> | <b>0.016</b> |              | 1.000        | <b>0.000</b> | <b>0.000</b> | 0.734        | <b>0.000</b> | <b>0.000</b> | <b>0.001</b> | <b>0.000</b> | <b>0.000</b> |
|      | HSA (0.5)    | 1.000        | 1.000        | <b>0.039</b> | <b>0.046</b> | 1.000        | <b>0.000</b> | <b>0.000</b> | 1.000        | 1.000        | 1.000        | 1.000        |              | <b>0.004</b> | <b>0.000</b> | 1.000        | <b>0.000</b> | <b>0.000</b> | 0.161        | <b>0.000</b> | <b>0.000</b> |
|      | HSA (1)      | <b>0.000</b> | 0.754        | 1.000        | 1.000        | 1.000        | 1.000        | <b>0.010</b> | <b>0.002</b> | 1.000        | 1.000        | <b>0.000</b> | <b>0.004</b> |              | 1.000        | 0.261        | 1.000        | <b>0.000</b> | 1.000        | <b>0.000</b> | <b>0.000</b> |
|      | HSA (2)      | <b>0.000</b> | <b>0.000</b> | 0.320        | 0.274        | <b>0.002</b> | 1.000        | 1.000        | <b>0.000</b> | <b>0.002</b> | <b>0.004</b> | <b>0.000</b> | <b>0.000</b> | 1.000        |              | <b>0.000</b> | 1.000        | 0.071        | 0.080        | <b>0.002</b> | <b>0.000</b> |
|      | OxyHSA (0.5) | 0.090        | 1.000        | 1.000        | 1.000        | 1.000        | <b>0.000</b> | <b>0.000</b> | 1.000        | 1.000        | 1.000        | 0.734        | 1.000        | 0.261        | <b>0.000</b> |              | <b>0.029</b> | <b>0.000</b> | 1.000        | <b>0.000</b> | <b>0.000</b> |
|      | OxyHSA (1)   | <b>0.000</b> | 0.092        | 1.000        | 1.000        | 0.662        | 1.000        | 0.092        | <b>0.000</b> | 0.744        | 1.000        | <b>0.000</b> | <b>0.000</b> | 1.000        | 1.000        | <b>0.029</b> |              | <b>0.000</b> | 1.000        | <b>0.000</b> | <b>0.000</b> |
|      | OxyHSA (2)   | <b>0.000</b> | <b>0.000</b> | <b>0.000</b> | <b>0.000</b> | <b>0.000</b> | 0.133        | 1.000        | <b>0.000</b> | <b>0.000</b> | <b>0.000</b> | <b>0.000</b> | <b>0.000</b> | <b>0.000</b> | 0.071        | <b>0.000</b> | <b>0.000</b> |              | <b>0.000</b> | 1.000        | 1.000        |
|      | RedHSA (0.5) | <b>0.000</b> | 1.000        | 1.000        | 1.000        | 1.000        | <b>0.042</b> | <b>0.000</b> | 0.077        | 1.000        | 1.000        | <b>0.001</b> | 0.161        | 1.000        | 0.080        | 1.000        | 1.000        | <b>0.000</b> |              | <b>0.000</b> | <b>0.000</b> |
|      | RedHSA (1)   | <b>0.000</b> | <b>0.000</b> | <b>0.000</b> | <b>0.000</b> | <b>0.000</b> | <b>0.003</b> | 0.520        | <b>0.000</b> | <b>0.000</b> | <b>0.000</b> | <b>0.000</b> | <b>0.000</b> | <b>0.000</b> | <b>0.002</b> | <b>0.000</b> | <b>0.000</b> | 1.000        | <b>0.000</b> |              | 1.000        |
|      | RedHSA (2)   | <b>0.000</b> | <b>0.000</b> | <b>0.000</b> | <b>0.000</b> | <b>0.000</b> | <b>0.000</b> | <b>0.014</b> | <b>0.000</b> | 1.000        | <b>0.000</b> | 1.000        |              |

## Figures

**Figure S1.** Calcification levels of cells cultured for 7 days in medium for fibroblast (FIBm) and osteogenic medium (OSTm). Results show significant differences in calcification after 24 h of culture. \*\*  $p < 0.01$ , \*\*\*  $p < 0.001$ .

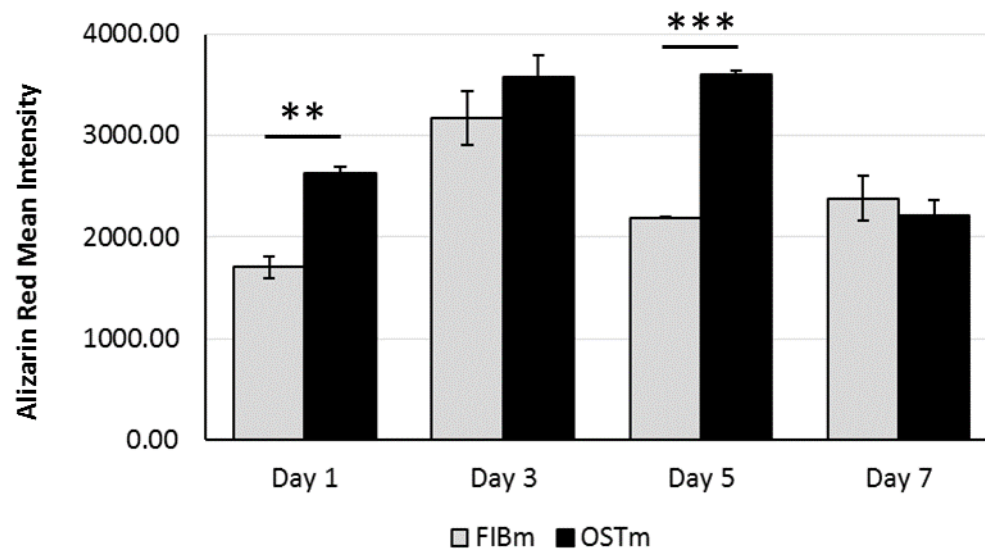

Supplement: s1 [file s1]
